# Supplementary material for: StarPEG–heparin biosensors for rapid and portable diagnostics in complex biofluids
Source: Royal Society of Chemistry journal article supplement (doi:10.1039/d2sd00036a), 2022-01-01
Supplement: d2sd00036a1.pdf [file d2sd00036a1.pdf]

## Electronic Supplementary Information

### **StarPEG-heparin biosensors for rapid and portable diagnostics in complex biofluids**

*Tim Thiele, Bergoi Ibarlucea\*, Teuku Fawzul Akbar, Carsten Werner, Gianarelio Cuniberti\**

Tim Thiele  
Institute for Materials Science and Max Bergmann Center of Biomaterial, Technische Universität Dresden, Dresden, 01062, Germany

Dr. B. Ibarlucea, Prof. G. Cuniberti  
Institute for Materials Science and Max Bergmann Center of Biomaterials, Center for advancing electronics Dresden (cfaed), Technische Universität Dresden, Dresden, 01062, Germany  
E-mail: [bergoi.ibarlucea@tu-dresden.de](mailto:bergoi.ibarlucea@tu-dresden.de), [gianaurelio.cuniberti@tu-dresden.de](mailto:gianaurelio.cuniberti@tu-dresden.de)

Teuku Fawzul Akbar, Prof. Carsten Werner  
Max Bergmann Center of Biomaterials, Leibniz Institute of Polymer Research Dresden, Hohe Strasse 6, 01069 Dresden, Germany

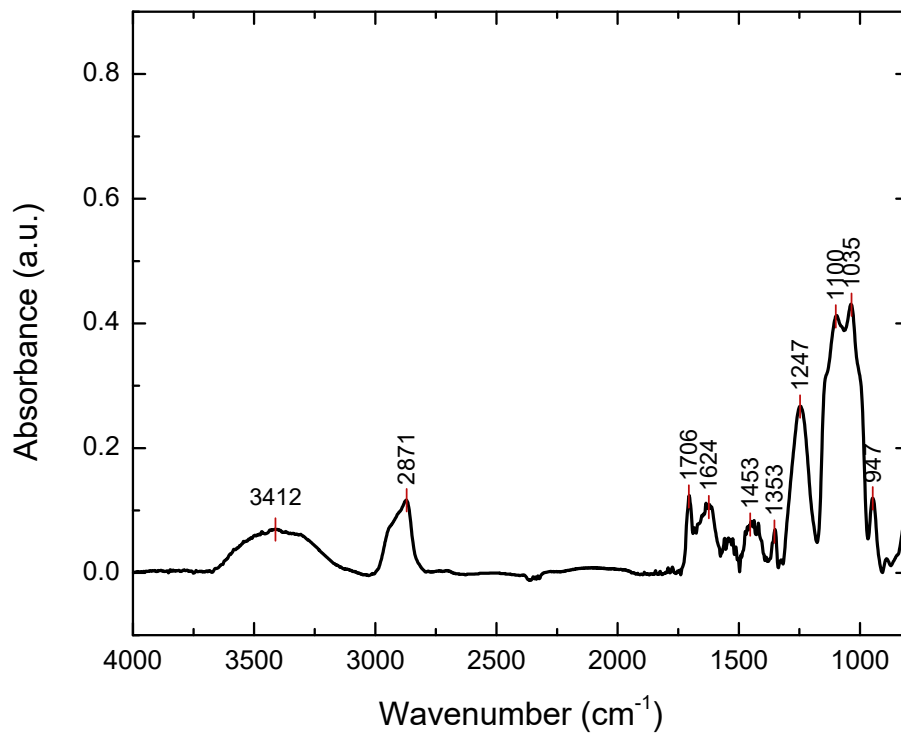

**Figure S1.** FTIR spectrum of the starPEG-heparin. Absorbance peaks at 1200 cm<sup>-1</sup> and 1615 cm<sup>-2</sup> are ascribed to the O=S=O stretching vibrations and COO<sup>-</sup> band respectively, indicating the presence of heparin.

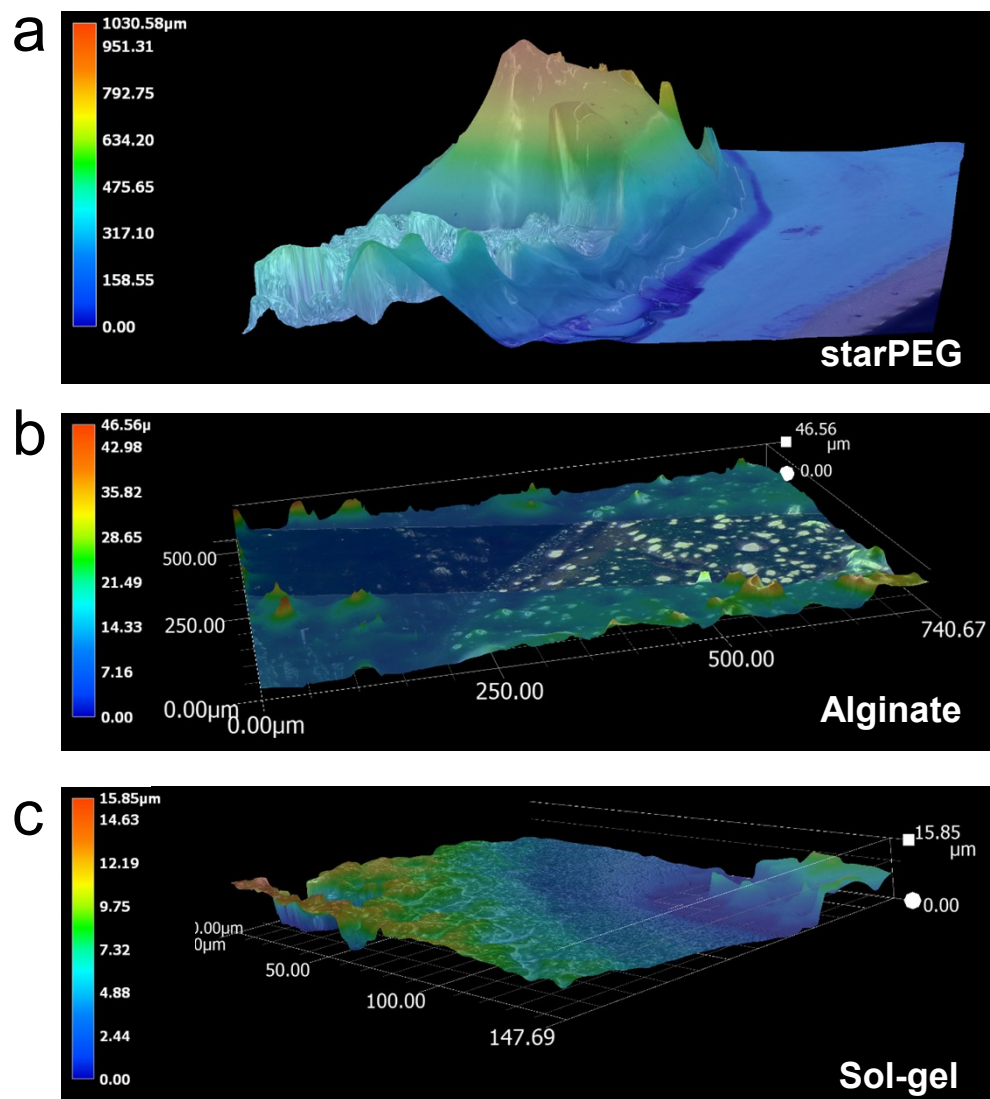

**Figure S2.** Additional thickness measurements of (a) starPEG-heparin, (b) alginate and (c) sol-gel.
